# Supplementary material
Source: publisher figshare collection journal article supplement (https://gsajournals.figshare.com/ndownloader/files/24982025)
Supplement: Supplementary file 1 [file 24982025]

| **plasmid name** | **insert/ description** | **source** | **plasmid number** |
| --- | --- | --- | --- |
| pFA6a-*kanMX6* | kanamycin resistance cassette | Addgene | 39296 |
| pAG25 | nourseothricin resistance cassette | Euroscarf | P30104 |
| pAG32 | hygromycin B resistance cassette | Euroscarf | P30106 |
| pFA6a-13Myc-*kanMX6* | Vector for Myc-tag with *kanMX6* selection marker | Addgene | 39294 |
| p*RAD30-natMX4* | insert *RAD30* gene into pAG25 | this study | 92 |
| p*RAD30(K546R)*  *-hphMX4* | insert *RAD30(K546R)* into pAG32 | this study | 102 |
| p*RAD30-invivoKR-*  *hphMX4* | insert *RAD30* gene with *in vivo* KR point mutations into pAG32 | this study | 847 |
| p*RAD30-invitroKR-hphMX4* | insert *RAD30* gene with *in vitro* KR point mutations into pAG32 | this study | 845 |
| pGEX-4T-3 | vector for expressing fusion proteins with a thrombin site | GE Healthcare | 28-9545-52 |
| pGEX-4T-3*-*  *RAD30* | vector for expressing GST-tagged Polη with a thrombin site | this study | 87 |
| pGEX-4T-3- *RAD30-3A* | vector for expressing GST-tagged *Polη-3A* with a thrombin site | this study | 90 |
| pGEX-4T-3*-ECO1* | vector for expressing GST-tagged Eco1 with a thrombin site | this study | 88 |
| pK3FS-*GAL1* | loxP-KanMX-loxP-GAL1p-  3FLAG | Addgene | 85778 |
| pSH47 | Cre-expressing (p*GAL1-cre*) CEN/ARS plasmid | Euroscarf | P30119 |
| pYM-N7 | vector for integrating *ADH* promoter with *natNT2* selection marker | Euroscarf | P30268 |
| pYM-N15 | vector for integrating *GPD* promoter with *natNT2* selection marker | Euroscarf | P30272 |

**Table S2. Plasmids used in this study**
